# Supplementary material
Source: publisher figshare collection journal article supplement (https://sage.figshare.com/ndownloader/files/19036916)
Supplement: Supplementary file 1 [file 19036916]

**Study Material Studies 1a and 1b**

**Start page**

Dear participant, welcome to our survey!

We are happy and grateful that you are supporting our research! This survey will take about 5 minutes to complete.

Please note: You will receive a code at the end of the questionnaire. In order to be paid for the successful completion of the survey, enter this code in the indicated field at Amazon Mechanical Turk.

Your data is treated confidentially. This study will not collect any data that would allow us to identify you or the computer you worked at.

A hint before starting: Please use only the specified button in order to navigate through the following pages. Just as now: Click “Continue”

___________________________

Dr. XXX YYY
Department of Social Psychology
Ulm University
xxx.yyy@uni-ulm.de

**Informed consent**

Our research team wants every participant to explicitly agree to their participation before taking part in the empirical investigation.

"I understand that my participation is voluntary and that I may withdraw from the study at any time without explanation."

yes

no

"I hereby confirm that I am at least 18 years old, and that I agree to take part in this study."

yes

no

**Interpersonal reactivtiy index (IRI)**

Please indicate how well the following statements describe you.

| does not describe me well  1 | 2 | 3 | 4 | 5 | 6 | describes me very well  7 |
| --- | --- | --- | --- | --- | --- | --- |
|  |  |  |  |  |  |  |

1. I often have tender, concerned feelings for people less fortunate than me.
2. I sometimes find it difficult to see things from the ‚other guy’s’ point of view.
3. Sometimes I don’t feel very sorry for other people when they are having problems.
4. I try to look at everybody’s side of a disagreement before I make a decision.
5. When I see someone being taken advantage of, I feel kind of protective towards them.
6. I sometimes try to understand my friends better by imagining how things look from their perspective.
7. Other people’s misfortunes do not usually disturb me a great deal.
8. If I’m sure I’m right about something, I don’t waste much time listening to other people’s arguments.
9. When I see someone being treated unfairly, I sometimes don’t feel very much pity for them.
10. I believe that there are two sides to every question and try to look at them both.
11. I am often quite touched by the things that I see happen.
12. When I’m upset at someone, I usually try to 'put myself in his shoes' for a while.
13. I would describe myself as a pretty soft-hearted person.
14. Before criticizing somebody, I try to imagine how I would feel if I were in their place.

**Social desirability**

The following questions deal with how you perceive yourself as a person.

Using the scale below as a guide, choose a number beside each statement to indicate how much you agree with it.

| not true  1 | 2 | 3 | somewhat true  4 | 5 | 6 | very true  7 |
| --- | --- | --- | --- | --- | --- | --- |
|  |  |  |  |  |  |  |

1. My first impressions of people usually turn out to be right.
2. I have not always been honest with myself.
3. I always know why I like things.
4. It’s hard for me to shut off a disturbing thought.
5. I sometimes lose out on things because I can’t make up my mind soon enough.
6. I am a completely rational person.
7. I rarely appreciate criticism.
8. I am very confident of my judgments.
9. I have sometimes doubted my ability as a lover.
10. I don’t always know the reasons why I do the things I do.
11. I sometimes tell lies if I have to.
12. There have been occasions when I have taken advantage of someone.
13. I never swear.
14. I sometimes try to get even rather than forgive and forget.
15. I have received too much change from a salesperson without telling him or her.
16. I always declare everything at customs.
17. I sometimes drive faster than the speed limit.
18. I have done things that I don’t tell other people about.
19. I never take things that don’t belong to me.
20. I have taken sick-leave from work or school even though I wasn’t really sick.

**Overclaiming**

Now please rate your familiarity with each item by choosing the appropriate number from 1 to 5.

1 means you never heard of it.

3 means you are somewhat familiar with it.
5 means you are very familiar with it.

Examples:

1. If you’re asked about "politicians" and the item said “Bill Clinton”, you would probably choose**‘4’ or ‘5’** to indicate that you are familiar with him.
2. If the category was "famous athletes" and the item said “Fred Gruneberg”, you would probably choose ‘**1**’ because you have never heard of him or a ‘**2**’ because he sounds vaguely familiar.

**Overclaiming**

Please rate your familiarity with each item by choosing the appropriate number from 1 to 5.

Category: Historical Names and Events

| never heard of it  1 | 2 | somewhat familiar  3 | 4 | very familiar  5 |
| --- | --- | --- | --- | --- |
|  |  |  |  |  |

1. Napoleon
2. Robespierre
3. El Puente
4. My Lai
5. The Lusitania
6. Ronald Reagan
7. Prince Lorenzo
8. The Luddites
9. Neville Chamberlain
10. Vichy Government
11. Queen Shattuck
12. Bay of Pigs
13. Torquemada
14. Wounded Knee
15. Clara Barton

**Overclaiming**

Please rate your familiarity with each item by choosing the appropriate number from 1 to 5.

Category: Fine Arts

| never heard of it  1 | 2 | somewhat familiar  3 | 4 | very familiar  5 |
| --- | --- | --- | --- | --- |
|  |  |  |  |  |

1. Mozart
2. a cappella
3. Pullman paintings
4. art deco
5. Paul Gauguin
6. Mona Lisa
7. La Neige Jaune
8. Mario Lanza
9. Verdi
10. Vermeer
11. Jackson Howell
12. Grand Pooh Bah
13. Botticelli
14. harpsichord
15. dramatis personae

**Overclaiming**

Please rate your familiarity with each item by choosing the appropriate number from 1 to 5.

Category: Language

| never heard of it  1 | 2 | somewhat familiar  3 | 4 | very familiar  5 |
| --- | --- | --- | --- | --- |
|  |  |  |  |  |

1. subjunctive
2. hyperbole
3. alliteration
4. sentence stigma
5. euphemism
6. double entendre
7. blank verse
8. pseudo-verb
9. ampersand
10. myth
11. aphorism
12. shunt-word
13. simile
14. acronym
15. synonym

**Overclaiming**

Please rate your familiarity with each item by choosing the appropriate number from 1 to 5.

Category: Books and poems

| never heard of it  1 | 2 | somewhat familiar  3 | 4 | very familiar  5 |
| --- | --- | --- | --- | --- |
|  |  |  |  |  |

1. Antigone
2. Murphy's Last Ride
3. Catcher in the Rye
4. The Bible
5. Hiawatha
6. Trapnell Meets Katz
7. Mein Kampf
8. The Aeneid
9. Faustus
10. The Boy Who Cried Wolf
11. Pygmalion
12. Hickory Dickory Dock
13. The Divine Comedy
14. Windermere Wild
15. The Raven

**Overclaiming**

Please rate your familiarity with each item by choosing the appropriate number from 1 to 5.

Category: Philosophy

| never heard of it  1 | 2 | somewhat familiar  3 | 4 | very familiar  5 |
| --- | --- | --- | --- | --- |
|  |  |  |  |  |

1. logistic heresy
2. creationism
3. Goedel’s theorem
4. social constructionism
5. Platonic sense
6. hermeneutics
7. esoteric deduction
8. ghost in the machine
9. Hegel
10. Socrates
11. categorical imperative
12. free will
13. Ayn Rand
14. situational ethics
15. Principia Mathematica

**Demographic information**

Finally, we need some personal information about yourself. Of course, your data remains anonymous.

1. How old are you?

_____

1. What is your gender?

woman

man

not specified

1. What is your profession / field of study?

_____________________________________

1. Do you live in the United States of America?

yes

no

1. Is English your first language?

yes

no

1. In case English is not your first language, for how long have you been studying English?

_____

1. Did you already participate in a similar study?

yes

no

1. What do you think was investigated in this study?

_____________________________________

**Study Material Study 2**

**Procedure bogus pipeline condition**

1. The participant enters the room and is welcomed briefly.
2. The participant is seated in front of the investigator. In front of the participant is a laptop and the blood pressure monitor with the arm and finger cuffs.

Investigator: *"Thank you for your willingness to participate in this study. Since your personal state of mind and feeling is of great interest for this study, you will wear these arm and finger cuffs during the study. With this physiological measurement of blood pressure, pulse, electrodermal activity, sweat activity and body temperature, we can conclude relatively reliably on your attitude regarding the topic of this study. So, it is important that you answer openly and honestly. Your physiology, measured by the cuffs, cannot be intentionally falsified anyway. Your physiological data will be recorded throughout the study and stored for following analyses. With the help of software, we are able to analyze your data and visualize any abnormalities, e.g. when you lie. In addition, we can view your physiological data in real time on this external monitor. The whole procedure is non-invasive and will not cause any damage. However, it is important to note that your fingers can turn blue and numb at short notice due to the pressure on your finger cuffs. This is completely normal and no cause for concern. If you are in pain, we can stop the examination at any time."*

1. Declaration of consent

Investigator: *“First of all, we need your consent to participate in this study. Please read the declaration of consent on the laptop in front of you and select the appropriate alternative. Then I'll put on the arm and finger cuffs."*

1. Putting on the finger and arm cuffs and waiting for the three-minute calibration phase
2. Simulation of the lie detector

Investigator*: “In the beginning, we have to measure reference values of you for our analyses. You will now be asked twice which university you are studying at. Please answer first with the truth (e.g. University of Ulm) and then with a lie (e.g. University of Dresden). Your physiological data while you answer with the truth, will be used as a reference value for times when you tell the truth during the study. Your physiological data while you lie, will be used to detect further lies while you answer the questionnaire."*

1. Start of the study

Investigator: *"Now you have learned about the functionality of the physiological measurements and we have recorded your reference values. The devices will continue to record your blood pressure, pulse, electrodermal activity, sweat activity and body temperature. So please remember to complete the following questionnaire honestly, as we can analyze any abnormalities through lies afterwards. You will now start to work on the actual study. Please complete the questionnaire on your laptop and contact me as soon as you are done."*

1. Afterwards the cuffs are taken off, the participant is thanked and handed out the reward.

**Procedure control condition**

1. The participant enters the room and is welcomed briefly.
2. The participant is seated in front of a laptop.

Investigator: *"Thank you for your willingness to participate in the study. Please sit in this seat and complete the study on the laptop in front of you."*

1. The participant completes the study without any further instructions.
2. Afterwards the participant is thanked and handed out the reward.

**Questionnaire**

**Start page for the bogus pipeline condition**

Dear participant,

Thank you for agreeing to participate in our study. The study will take about 15 - 20 minutes to complete. All data is collected anonymously so that your answers cannot be traced back to you personally. As an expense allowance for your participation, you will receive a chocolate bar at the end.

The aim of this study is to investigate how people with a serious chronic disease are perceived. People with a serious illness often depend on other people, not only in their daily lives, but also when they need an organ donation. For this reason, it is important to know how these people are perceived. This study is carried out by the Department of Social Psychology at the University of Ulm in cooperation with the University Hospital Ulm, which has a large donor database of potential donors.

Important:

Please note that the arm and finger cuffs continuously record your pulse, electrodermal activity, sweat activity and body temperature during the time of the following study. This data is also stored for later analyses. With the help of software, we are able to analyze your data and visualize any abnormalities, e.g. when you lie.So, it is important that you answer openly and honestly. Your physiology, measured by the cuffs, cannot be intentionally falsified anyway.

Dr. XXX YYY

Department of Social Psychology

Ulm University

xxx.yyy@uni-ulm.de

**Start page for the control condition**

Dear participant,

Thank you for agreeing to participate in our study. The study will take about 15 - 20 minutes to complete. All data is collected anonymously so that your answers cannot be traced back to you personally. As an expense allowance for participation, you will receive a chocolate bar at the end.

The aim of this study is to investigate how people with a serious chronic disease are perceived. People with a serious illness often depend on other people, not only in their daily lives, but also when they need an organ donation. For this reason, it is important to know how these people are perceived. This study is carried out by the Department of Social Psychology at the University of Ulm in cooperation with the University Hospital Ulm, which has a large donor database of potential donors.

Dr. XXX YYY

Department of Social Psychology

Ulm University

xxx.yyy@uni-ulm.de

**Informed Consent**

The guidelines of the German Research Foundation (DFG) require that participants in empirical studies must explicitly and comprehensibly agree to voluntarily participate in our research.

For this reason, we would like to ask you to read this declaration of consent before participating in our study.

For your information, we collected some tips on our research procedures.

**Project management:** Dr. XXX YYY

+49 (0) 731 ----------

xxx.yyy@uni-ulm.de

**Research topic:** Our research group is interested in human information processing in a social environment. This study deals with an important aspect of this topic.

**Examination procedure:** In the present study, you will perform one or more of the following activities: Answering questions, memorizing information, retrieving information from memory, making judgments, working on mental tasks and / or performing certain tasks on the computer. The investigator will be happy to answer any questions you may have after the study has been completed. It is important for our research that you process the individual tasks and activities in the given order.

**Duration and expense allowance:** The duration of the study and the expense allowance for your participation correspond to the information given on the advertising posters / in the information email.

**Possible benefit:** By participating in this study, you will have the opportunity to gain a deeper insight into psychological research. In addition, the results of this study help us all in our understanding of human information processing.

**Confidentiality:** Your data are treated confidential and will only be used anonymously. We will not ask you about your name at any point of this study. Demographic data, such as age or gender, do not allow us to draw any clear conclusion about your person.

**Experiences associated with participation:** Participation in this study does not create a risk that goes beyond the risks of everyday life. The exact purpose of this investigation can only be fully explained at the end of the study, as otherwise the validity of the results could be affected. By signing the declaration of consent, you agree that you will not be fully informed of the exact purpose of the study until the end of the study.

**Voluntary participation:** Your participation in this study is voluntary. At any time during this study, you are free to cancel your participation without any disadvantages.

**Open questions:** If you have any questions about this study, please contact the project manager of this investigation. If you have any questions that cannot be answered by the investigator, please contact the project management.

The guidelines of the German Research Foundation (DFG) require that every participant in an empirical study must declare his/her consent to participate. Please read the declaration of consent carefully.

I hereby confirm that I am at least 18 years old and have read and fully understood the declaration of consent.

yes

no

**Introduction**

The aim of this study is to investigate how people with a serious chronic disease are perceived. People with a serious illness often depend on other people. Not only in everyday life, but also when they need an organ donation. For this reason, it is important to know how these people are perceived. This study is carried out by the Department of Social Psychology at the University of Ulm in cooperation with the University Hospital Ulm, which has a large donor database of potential donors. In the following you will get to know Julian, who suffers from renal insufficiency and could be helped by a kidney transplant. You will then be asked to answer questions about Julian.

**Instructions for the high-empathy condition**

In the following you will get to know Julian. Julian suffers from renal failure and has to go to dialysis regularly. His experiences after the diagnosis cause severe grief for Julian. Please read the following story and try to imagine how Julian feels. It's a situation that caused Julian to mourn. Please try to feel what he just went through and how he feels.

Shortly before an important final examination of his studies at the University of Ulm, Julian often has a strong feeling of vertigo during the lectures. He decides to visit a doctor. After the examination, it turns out that he only has a 10% kidney function. The doctor explains to him that he suffers from renal insufficiency and has to go to dialysis regularly from now on. He is explained the side effects of his disease and the possibility of treatment by a kidney transplantation. However, the doctor also tells him that he cannot be sure of finding a suitable donor for him. After the doctor's appointment, Julian starts crying outside. He feels desperate and miserable.

In the following time, Julian can only concentrate poorly, is often tired and feels completely shattered. The first dialysis starts and Julian loses so much strength over time that he can no longer go to university regularly. Instead, he has to go to dialysis three times a week for several hours. These regular dialysis treatments change his life and take up a lot of time. Julian often feels very weak. He feels deeply sad that he can no longer lead a normal life and often has too little strength for beautiful activities that used to be normal.

Now, please describe briefly how Julian feels and what he is going through.

**Instructions for the low-empathy condition**

In the following you will get to know Julian. Julian suffers from renal failure and has to go to dialysis regularly. His experiences after the diagnosis cause severe grief for Julian. Please read the following story and try not to let yourself be caught by what you read, but remain as objective and detached as possible. Please pay attention to the objective content mentioned in the text.

Shortly before an important final examination of his studies at the University of Ulm, Julian often has a strong feeling of vertigo during the lectures. He decides to visit a doctor. After the examination, it turns out that he only has a 10% kidney function. The doctor explains to him that he suffers from renal insufficiency and has to go to dialysis regularly from now on. He is explained the side effects of his disease and the possibility of treatment by a kidney transplantation. However, the doctor also tells him that he cannot be sure of finding a suitable donor for him. After the doctor's appointment, Julian starts crying outside. He feels desperate and miserable.

In the following time, Julian can only concentrate poorly, is often tired and feels completely shattered. The first dialysis starts and Julian loses so much strength over time that he can no longer go to university regularly. Instead, he has to go to dialysis three times a week for several hours. These regular dialysis treatments change his life and take up a lot of time. Julian often feels very weak. He feels deeply sad that he can no longer lead a normal life and often has too little strength for beautiful activities that used to be normal.

Now, please describe the contents mentioned in the story.

**Empathic feelings**

Now, please tell us how you felt while reading the text about Julian.

| does not describe me well  1 | 2 | 3 | 4 | 5 | 6 | describes me very well  7 |
| --- | --- | --- | --- | --- | --- | --- |
|  |  |  |  |  |  |  |

1. compassionate

2. worried

3. sensitive

4. soft-hearted

5. sympathetic

6. moved

**Help behavior**

As we briefly reported at the beginning of this study, the University Hospital Ulm has a large donor database. These must be contacted by telephone in order to obtain more detailed information about the possible donors. Further information on the exact procedure can be obtained from the investigator after completing this questionnaire.

Please take a moment to consider how much time you would be willing to invest to contact potential donors by phone.

Enter a number of 0 - 300 minutes in the field below. The number 0 would mean that you would not invest any time to contact people over the phone. The number 50 would mean that you would invest 50 minutes to call people, with the number 90 you would invest 90 minutes etc. This opportunity to invest time in making calls to potential donors is entirely voluntary. All telephone costs will be covered by us, so you don't have any extra expenses. Please consider this now and then enter a number between 0-300.

_____

**Interpersonal reactivtiy index (IRI)**

Please indicate how well the following statements describe you.

| does not describe me well  1 | 2 | 3 | 4 | 5 | 6 | describes me very well  7 |
| --- | --- | --- | --- | --- | --- | --- |
|  |  |  |  |  |  |  |

1. I often have tender, concerned feelings for people less fortunate than me.
2. I sometimes find it difficult to see things from the ‚other guy’s’ point of view.
3. Sometimes I don’t feel very sorry for other people when they are having problems.
4. I try to look at everybody’s side of a disagreement before I make a decision.
5. When I see someone being taken advantage of, I feel kind of protective towards them.
6. I sometimes try to understand my friends better by imagining how things look from their perspective.
7. Other people’s misfortunes do not usually disturb me a great deal.
8. If I’m sure I’m right about something, I don’t waste much time listening to other people’s arguments.
9. When I see someone being treated unfairly, I sometimes don’t feel very much pity for them.
10. I believe that there are two sides to every question and try to look at them both.
11. I am often quite touched by the things that I see happen.
12. When I’m upset at someone, I usually try to 'put myself in his shoes' for a while.
13. I would describe myself as a pretty soft-hearted person.
14. Before criticizing somebody, I try to imagine how I would feel if I were in their place.

**Typical participant**

What do you think is expected from a typical participant who reads Julian's story?

A typical participant should....

| does not describe me well  1 | 2 | 3 | 4 | 5 | 6 | describes me very well  7 |
| --- | --- | --- | --- | --- | --- | --- |
|  |  |  |  |  |  |  |

1. feel compassionate
2. feel worried
3. feel sensitive
4. feel soft-hearted
5. feel sympathetic
6. feel moved

**Social desirability**

The following questions deal with how you perceive yourself as a person.

Using the scale below as a guide, choose a number beside each statement to indicate how much you agree with it.

| not true  1 | 2 | 3 | somewhat true  4 | 5 | 6 | very true  7 |
| --- | --- | --- | --- | --- | --- | --- |
|  |  |  |  |  |  |  |

1. My first impressions of people usually turn out to be right.
2. I have not always been honest with myself.
3. I always know why I like things.
4. It’s hard for me to shut off a disturbing thought.
5. I sometimes lose out on things because I can’t make up my mind soon enough.
6. I am a completely rational person.
7. I rarely appreciate criticism.
8. I am very confident of my judgments.
9. I have sometimes doubted my ability as a lover.
10. I don’t always know the reasons why I do the things I do.
11. I sometimes tell lies if I have to.
12. There have been occasions when I have taken advantage of someone.
13. I never swear.
14. I sometimes try to get even rather than forgive and forget.
15. I have received too much change from a salesperson without telling him or her.
16. I always declare everything at customs.
17. This is an attention check item. Please answer: "very true".
18. I sometimes drive faster than the speed limit.
19. I have done things that I don’t tell other people about.
20. I never take things that don’t belong to me.
21. I have taken sick-leave from work or school even though I wasn’t really sick.

**Overclaiming**

Now please rate your familiarity with each item by choosing the appropriate number from 1 to 5.

1 means you never heard of it.

3 means you are somewhat familiar with it.
5 means you are very familiar with it.

Examples:

1. If you’re asked about "politicians" and the item said “Bill Clinton”, you would probably choose**‘4’ or ‘5’** to indicate that you are familiar with him.
2. If the category was "famous athletes" and the item said “Fred Gruneberg”, you would probably choose ‘**1**’ because you have never heard of him or a ‘**2**’ because he sounds vaguely familiar.

**Overclaiming**

Please rate your familiarity with each item by choosing the appropriate number from 1 to 5.

Category: Historical Names and Events

| never heard of it  1 | 2 | somewhat familiar  3 | 4 | very familiar  5 |
| --- | --- | --- | --- | --- |
|  |  |  |  |  |

1. Napoleon
2. Robespierre
3. El Puente
4. My Lai
5. The Lusitania
6. Ronald Reagan
7. Prince Lorenzo
8. The Luddites
9. Neville Chamberlain
10. Vichy Government
11. Queen Shattuck
12. Bay of Pigs
13. Torquemada
14. Wounded Knee
15. Clara Barton

**Overclaiming**

Please rate your familiarity with each item by choosing the appropriate number from 1 to 5.

Category: Fine Arts

| never heard of it  1 | 2 | somewhat familiar  3 | 4 | very familiar  5 |
| --- | --- | --- | --- | --- |
|  |  |  |  |  |

1. Mozart
2. a cappella
3. Pullman paintings
4. art deco
5. Paul Gauguin
6. Mona Lisa
7. La Neige Jaune
8. Mario Lanza
9. Verdi
10. Vermeer
11. Jackson Howell
12. Grand Pooh Bah
13. Botticelli
14. harpsichord
15. dramatis personae

**Overclaiming**

Please rate your familiarity with each item by choosing the appropriate number from 1 to 5.

Category: Language

| never heard of it  1 | 2 | somewhat familiar  3 | 4 | very familiar  5 |
| --- | --- | --- | --- | --- |
|  |  |  |  |  |

1. subjunctive
2. hyperbole
3. alliteration
4. sentence stigma
5. euphemism
6. double entendre
7. blank verse
8. pseudo-verb
9. ampersand
10. myth
11. aphorism
12. shunt-word
13. simile
14. acronym
15. synonym

**Overclaiming**

Please rate your familiarity with each item by choosing the appropriate number from 1 to 5.

Category: Books and poems

| never heard of it  1 | 2 | somewhat familiar  3 | 4 | very familiar  5 |
| --- | --- | --- | --- | --- |
|  |  |  |  |  |

1. Antigone
2. Murphy's Last Ride
3. Catcher in the Rye
4. The Bible
5. Hiawatha
6. Trapnell Meets Katz
7. Mein Kampf
8. The Aeneid
9. Faustus
10. The Boy Who Cried Wolf
11. Pygmalion
12. Hickory Dickory Dock
13. The Divine Comedy
14. Windermere Wild
15. The Raven

**Overclaiming**

Please rate your familiarity with each item by choosing the appropriate number from 1 to 5.

Category: Philosophy

| never heard of it  1 | 2 | somewhat familiar  3 | 4 | very familiar  5 |
| --- | --- | --- | --- | --- |
|  |  |  |  |  |

1. logistic heresy
2. creationism
3. Goedel’s theorem
4. social constructionism
5. Platonic sense
6. hermeneutics
7. esoteric deduction
8. ghost in the machine
9. Hegel
10. Socrates
11. categorical imperative
12. free will
13. Ayn Rand
14. situational ethics
15. Principia Mathematica

**Demographic information**

Finally, we need some personal information about yourself. Of course, your data remains anonymous.

1. What is your gender?

woman

man

not specified

1. How old are you?

_____

1. Is German your first language?

yes

no

1. In case German is not your first language, for how long have you been studying German?

_____

1. What is your highest level of education?

completion of compulsory basic secondary school

certificate of secondary school

vocational qualification

high-school diploma

professional qualification

university degree

other educational achievement

1. Please choose your field of study.

electrical engineering

information systems engineering

computer science

media informatics

psychology

software engineering

computational science and engineering

mathematics

mathematical biometrics

sustainable corporate governance

business mathematics

economic sciences

human medicine

molecular medicine

dentistry

biology

biochemistry

chemistry

chemical engineering

industrial biotechnology

pharmaceutical biotechnology

physics

business chemistry

business physics

teacher training

1. Did you already participate in a similar study?

yes

no

1. What do you think was investigated in this study?

_____________________________________

**Debriefing bogus pipeline condition**

Dear participant,

Please do not pass on the following information to your fellow students or friends, as they may also be considered as participants. This could endanger the quality and significance of the data obtained. We will continue with this study and therefore depend on your secrecy.

The aim of the study is to replicate and expand fundamental effects of classical empathy research. The story of Julian, which you read at the beginning of the study, is not a real story.

It is also not true, that this study is conducted in cooperation with the University Hospital Ulm. You do not have to make any phone calls with potential organ donors. This procedure is necessary in order to record everyday behavioral intentions (in this case help behavior) in a laboratory study.

Furthermore, contrary to the initial announcement, we did not record any physiological data using the arm and finger cuffs. This means that we could not detect your physiological state at any time during this study. This procedure is necessary because we are interested in your intuitive and spontaneous answers. In this way, we wanted to avoid that you think you have to answer like a typical participant.

If you are interested in further information, please leave your email address on the corresponding list.

**Debriefing control condition**

Dear participant,

Please do not pass on the following information to your fellow students or friends, as they may also be considered as test participants. This could endanger the quality and significance of the data obtained. We will continue with this study and therefore depend on your secrecy.

The aim of the study is to replicate and expand fundamental effects of classical empathy research. The story of Julian, which you read at the beginning of the study, is not a real story.

It is also not true, that this study is conducted in cooperation with the University Hospital Ulm. You do not have to make any phone calls with potential organ donors. This procedure is necessary in order to record everyday behavioral intentions (in this case help behavior) in a laboratory study.

If you are interested in further information, please leave your email address on the corresponding list.
